# Supplementary material for: HPLC Determination of Colistin in Human Urine Using Alkaline Mobile Phase Combined with Post-Column Derivatization: Validation Using Accuracy Profiles
Source: MDPI journal article supplement (doi:10.3390/molecules27113489), 2022-05-28
Supplement: s1 [file s1]

SUPPLEMENTARY MATERIAL

# HPLC Determination of Colistin in Human Urine Using Alkaline Mobile Phase Combined with Post-Column Derivatization: Validation Using Accuracy Profiles

Kalliopi Papavasileiou <sup>1</sup>, Apostolia Tsiasioti <sup>1</sup>, Paraskevas D. Tzanavaras <sup>1</sup> and Constantinos K. Zacharis <sup>2,\*</sup>

<sup>1</sup> Laboratory of Analytical Chemistry, School of Chemistry, Faculty of Sciences, Aristotle University of Thessaloniki, GR-54124 Thessaloniki, Greece; papakall@chem.auth.gr (K.P.); atsiasioti@gmail.com (A.T.); ptzanava@chem.auth.gr (P.D.T.)

<sup>2</sup> Laboratory of Pharmaceutical Analysis, Department of Pharmaceutical Technology, School of Pharmacy, Aristotle University of Thessaloniki, GR-54124 Thessaloniki, Greece

\* Correspondence: czacharis@pharm.auth.gr; Tel.: +30-2310997663

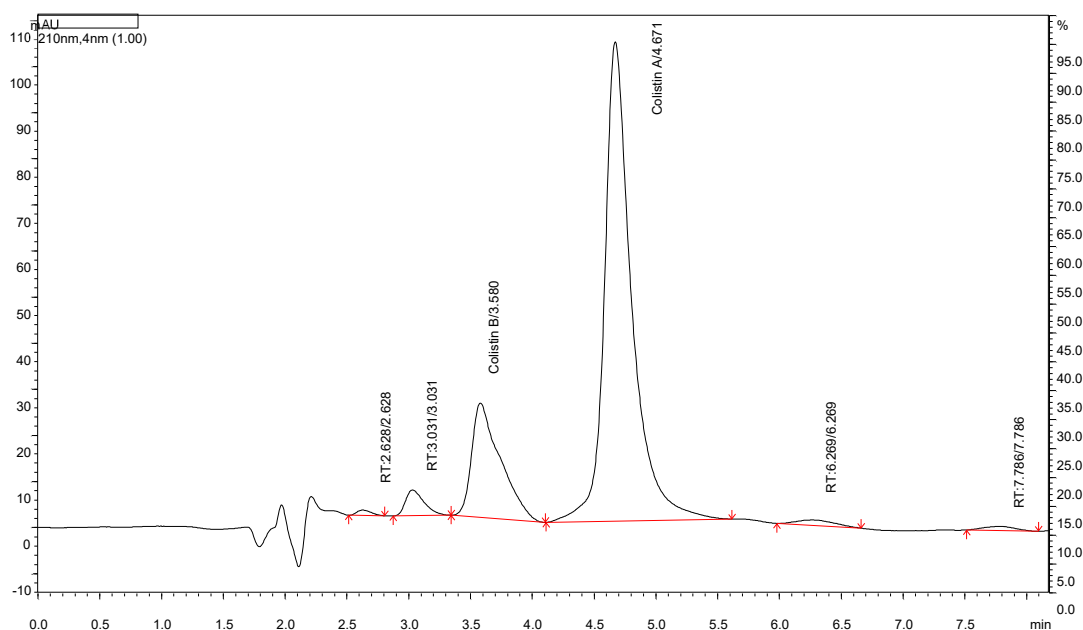

**Figure S1.** Representative HPLC-UV chromatogram of the purity determination of colistin reference standard (provided by AppliChem). Experimental conditions: Kinetex EVO C18 core-shell (100 × 4.6 mm, 2.6 µm), 10 mM borate buffer (pH 11.0)/ACN, 65/35 v/v,  $\lambda$  = 210 nm, injection volume: 10 µL, Column temperature: 25 °C.

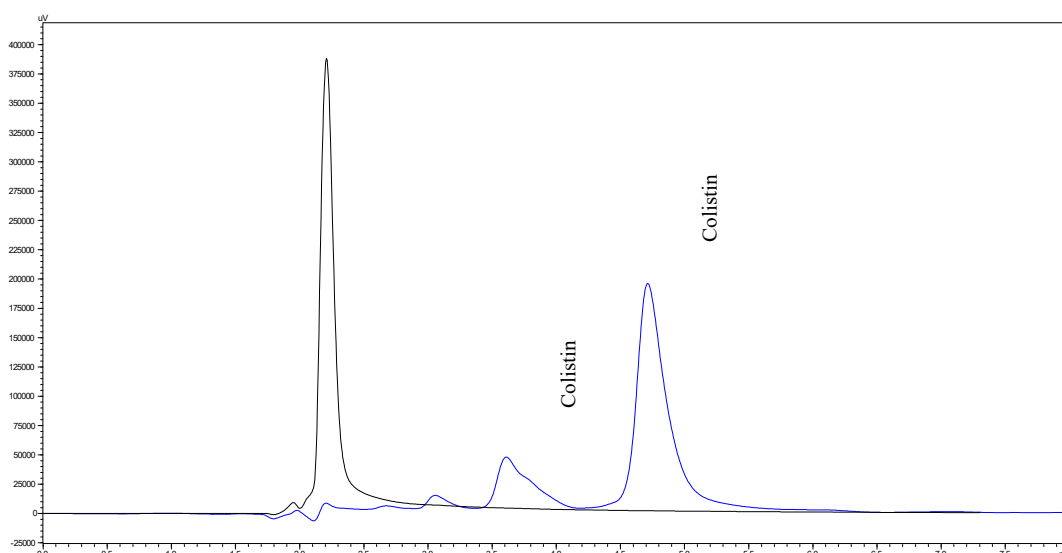

**Figure S2.** Analysis of colistin sulfate using 20 mM phosphate buffer/ACN, 65/35% v/v, at pH 3 (black line) and pH 11 (blue line).

## Simulation Results

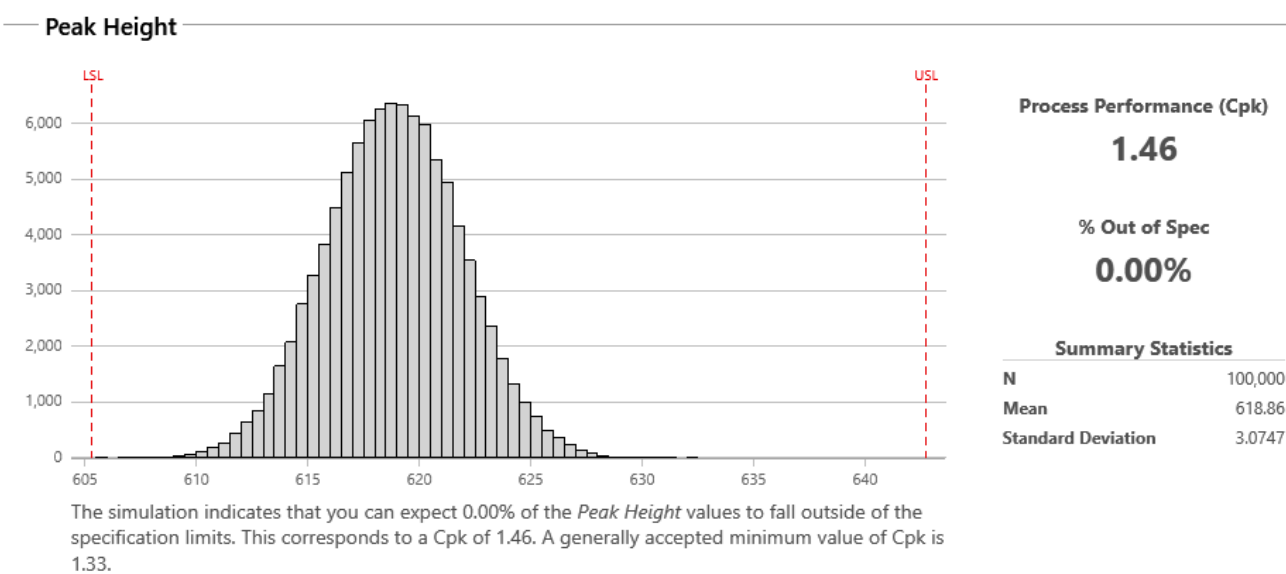

**Figure S3.** Probabilistic distribution of the peak height of Colistin during Monte-Carlo simulation experiments.

Table S1. Experimental runs generated by Box-Behnken design.

| Run No | Borate buffer<br>(Factor 1) | C(NAC)<br>(Factor 2) | Reaction<br>temperature<br>(Factor 3) | C(OPA)<br>(Factor 4) | Qv (PCD)<br>(Factor 5) | Peak Height<br>(mV) |
|--------|-----------------------------|----------------------|---------------------------------------|----------------------|------------------------|---------------------|
| 1      | 10                          | 15                   | 50                                    | 15                   | 0.5                    | 740                 |
| 2      | 10                          | 15                   | 37.5                                  | 15                   | 0.25                   | 720                 |
| 3      | 100                         | 25                   | 37.5                                  | 15                   | 0.5                    | 713                 |
| 4      | 55                          | 15                   | 37.5                                  | 15                   | 0.5                    | 665                 |
| 5      | 100                         | 15                   | 50                                    | 15                   | 0.5                    | 653                 |
| 6      | 100                         | 15                   | 25                                    | 15                   | 0.5                    | 597                 |
| 7      | 10                          | 15                   | 37.5                                  | 15                   | 0.75                   | 620                 |
| 8      | 55                          | 15                   | 50                                    | 12.5                 | 0.5                    | 692                 |
| 9      | 55                          | 15                   | 25                                    | 15                   | 0.75                   | 598                 |
| 10     | 100                         | 15                   | 37.5                                  | 5                    | 0.5                    | 695                 |
| 11     | 55                          | 5                    | 37.5                                  | 15                   | 0.75                   | 502                 |
| 12     | 55                          | 25                   | 37.5                                  | 15                   | 0.25                   | 750                 |
| 13     | 55                          | 15                   | 37.5                                  | 15                   | 0.5                    | 670                 |
| 14     | 55                          | 25                   | 25                                    | 15                   | 0.5                    | 717                 |
| 15     | 55                          | 25                   | 37.5                                  | 15                   | 0.75                   | 610                 |
| 16     | 55                          | 5                    | 25                                    | 15                   | 0.5                    | 530                 |
| 17     | 55                          | 15                   | 37.5                                  | 15                   | 0.5                    | 655                 |
| 18     | 10                          | 15                   | 25                                    | 15                   | 0.5                    | 610                 |
| 19     | 55                          | 25                   | 37.5                                  | 5                    | 0.5                    | 702                 |
| 20     | 55                          | 15                   | 37.5                                  | 12.5                 | 0.75                   | 636                 |
| 21     | 55                          | 15                   | 37.5                                  | 15                   | 0.5                    | 735                 |
| 22     | 55                          | 15                   | 37.5                                  | 15                   | 0.5                    | 745                 |
| 23     | 55                          | 15                   | 50                                    | 15                   | 0.75                   | 622                 |
| 24     | 55                          | 5                    | 37.5                                  | 12.5                 | 0.5                    | 625                 |
| 25     | 100                         | 5                    | 37.5                                  | 15                   | 0.5                    | 585                 |
| 26     | 55                          | 15                   | 37.5                                  | 12.5                 | 0.25                   | 765                 |
| 27     | 55                          | 5                    | 50                                    | 15                   | 0.5                    | 595                 |
| 28     | 55                          | 5                    | 37.5                                  | 5                    | 0.5                    | 555                 |
| 29     | 55                          | 15                   | 25                                    | 5                    | 0.5                    | 588                 |
| 30     | 10                          | 5                    | 37.5                                  | 15                   | 0.5                    | 611                 |
| 31     | 100                         | 15                   | 37.5                                  | 12.5                 | 0.5                    | 670                 |
| 32     | 55                          | 15                   | 25                                    | 15                   | 0.25                   | 680                 |
| 33     | 55                          | 25                   | 37.5                                  | 12.5                 | 0.5                    | 732                 |
| 34     | 55                          | 5                    | 37.5                                  | 15                   | 0.25                   | 690                 |
| 35     | 100                         | 15                   | 37.5                                  | 15                   | 0.75                   | 630                 |
| 36     | 55                          | 15                   | 37.5                                  | 15                   | 0.5                    | 680                 |
| 37     | 100                         | 15                   | 37.5                                  | 15                   | 0.25                   | 790                 |
| 38     | 10                          | 15                   | 37.5                                  | 12.5                 | 0.5                    | 725                 |
| 39     | 10                          | 15                   | 37.5                                  | 5                    | 0.5                    | 695                 |
| 40     | 55                          | 15                   | 50                                    | 5                    | 0.5                    | 668                 |
| 41     | 55                          | 25                   | 50                                    | 15                   | 0.5                    | 726                 |
| 42     | 55                          | 15                   | 37.5                                  | 5                    | 0.25                   | 711                 |
| 43     | 55                          | 15                   | 37.5                                  | 5                    | 0.75                   | 650                 |
| 44     | 44                          | 55                   | 15                                    | 25                   | 12.5                   | 633                 |
| 45     | 45                          | 55                   | 15                                    | 50                   | 15                     | 747                 |
| 46     | 46                          | 10                   | 25                                    | 37.5                 | 15                     | 765                 |

**Table S2.** Validation results for the quantitation of Colistin B in a pooled drug-free urine sample ( $n = 6$ ).

| Validation criteria                                                                      |                                       |                                       |          |
|------------------------------------------------------------------------------------------|---------------------------------------|---------------------------------------|----------|
| Response function (linear unweighted)                                                    | Slope                                 | Intercept                             | <i>r</i> |
| <i>(k<sup>a</sup> = 3; m = 3; n = 3) (350—3500 nmol L<sup>-1</sup>)</i>                  |                                       |                                       |          |
| Day 1                                                                                    | 293.46                                | −38168                                | 0.9973   |
| Day 2                                                                                    | 331.94                                | −14208                                | 0.9999   |
| Day 3                                                                                    | 330.24                                | −8400                                 | 0.9999   |
| Precision ( <i>k</i> = 3; <i>n</i> = 3)                                                  |                                       |                                       |          |
| C (nmol L <sup>-1</sup> )                                                                | <i>s<sub>r</sub></i> (%) <sup>b</sup> | <i>s<sub>R</sub></i> (%) <sup>c</sup> |          |
| 350                                                                                      | 1.6                                   | 3.2                                   |          |
| 1750                                                                                     | 0.8                                   | 2.6                                   |          |
| 3500                                                                                     | 1.8                                   | 2.8                                   |          |
| Trueness ( <i>k</i> = 3; <i>n</i> = 3)                                                   |                                       |                                       |          |
| C (nmol L <sup>-1</sup> )                                                                | Relative bias (%)                     |                                       |          |
| 350                                                                                      | −2.8                                  |                                       |          |
| 1750                                                                                     | 2.5                                   |                                       |          |
| 3500                                                                                     | −0.2                                  |                                       |          |
| Accuracy ( <i>k</i> = 3; <i>n</i> = 3)                                                   |                                       |                                       |          |
| C (nmol L <sup>-1</sup> )                                                                | Relative β-ETI (%)                    |                                       |          |
| 350                                                                                      | [−14.68, 9.1]                         |                                       |          |
| 1750                                                                                     | [−7.55, 12.6]                         |                                       |          |
| 3500                                                                                     | [−12.46, 12.80]                       |                                       |          |
| Linearity ( <i>k</i> = 3; <i>n</i> = 3; <i>m</i> = 3) (350 – 3500 nmol L <sup>-1</sup> ) |                                       |                                       |          |
| Slope                                                                                    | 1.005                                 |                                       |          |
| Intercept                                                                                | 14.48                                 |                                       |          |
| <i>r</i> <sup>2</sup>                                                                    | 0.9999                                |                                       |          |
| LOD (nmol L <sup>-1</sup> )                                                              | 100                                   |                                       |          |
| LLOQ (nmol L <sup>-1</sup> )                                                             | 350                                   |                                       |          |

<sup>a</sup>  $k$ ,  $m$  and  $n$  correspond to the number of experiments, calibration levels and replicates, respectively.

<sup>b</sup>  $s_r$  (%): relative standard deviation under repeatability conditions.

<sup>c</sup>  $s_R$  (%): relative standard deviation under intermediate precision.
